# Supplementary material
Source: MDPI journal article supplement (https://www.mdpi.com/2079-6412/12/5/572)
Supplement: s1 [file s1]

# Supplementary Material

## **Structural and chemical peculiarities of nitrogen-doped graphene grown by direct microwave plasma-enhanced chemical vapor deposition**

**Šarūnas Meškinis <sup>1</sup>, Rimantas Gudaitis <sup>1</sup>, Mindaugas Andrulevičius <sup>1</sup> and Algirdas Lazauskas <sup>1,\*</sup>**

<sup>1</sup> Institute of Materials Science, Kaunas University of Technology, K. Baršausko 59, LT51423 Kaunas, Lithuania; mindaugas.andrulevicius@ktu.lt (M.A.); rimantas.gudaitis@ktu.lt (R.G); sarunas.meskinis@ktu.lt (Š.M.);

\* Correspondence: algirdas.lazauskas@ktu.edu (A.L.); Tel.: +370-671-73375

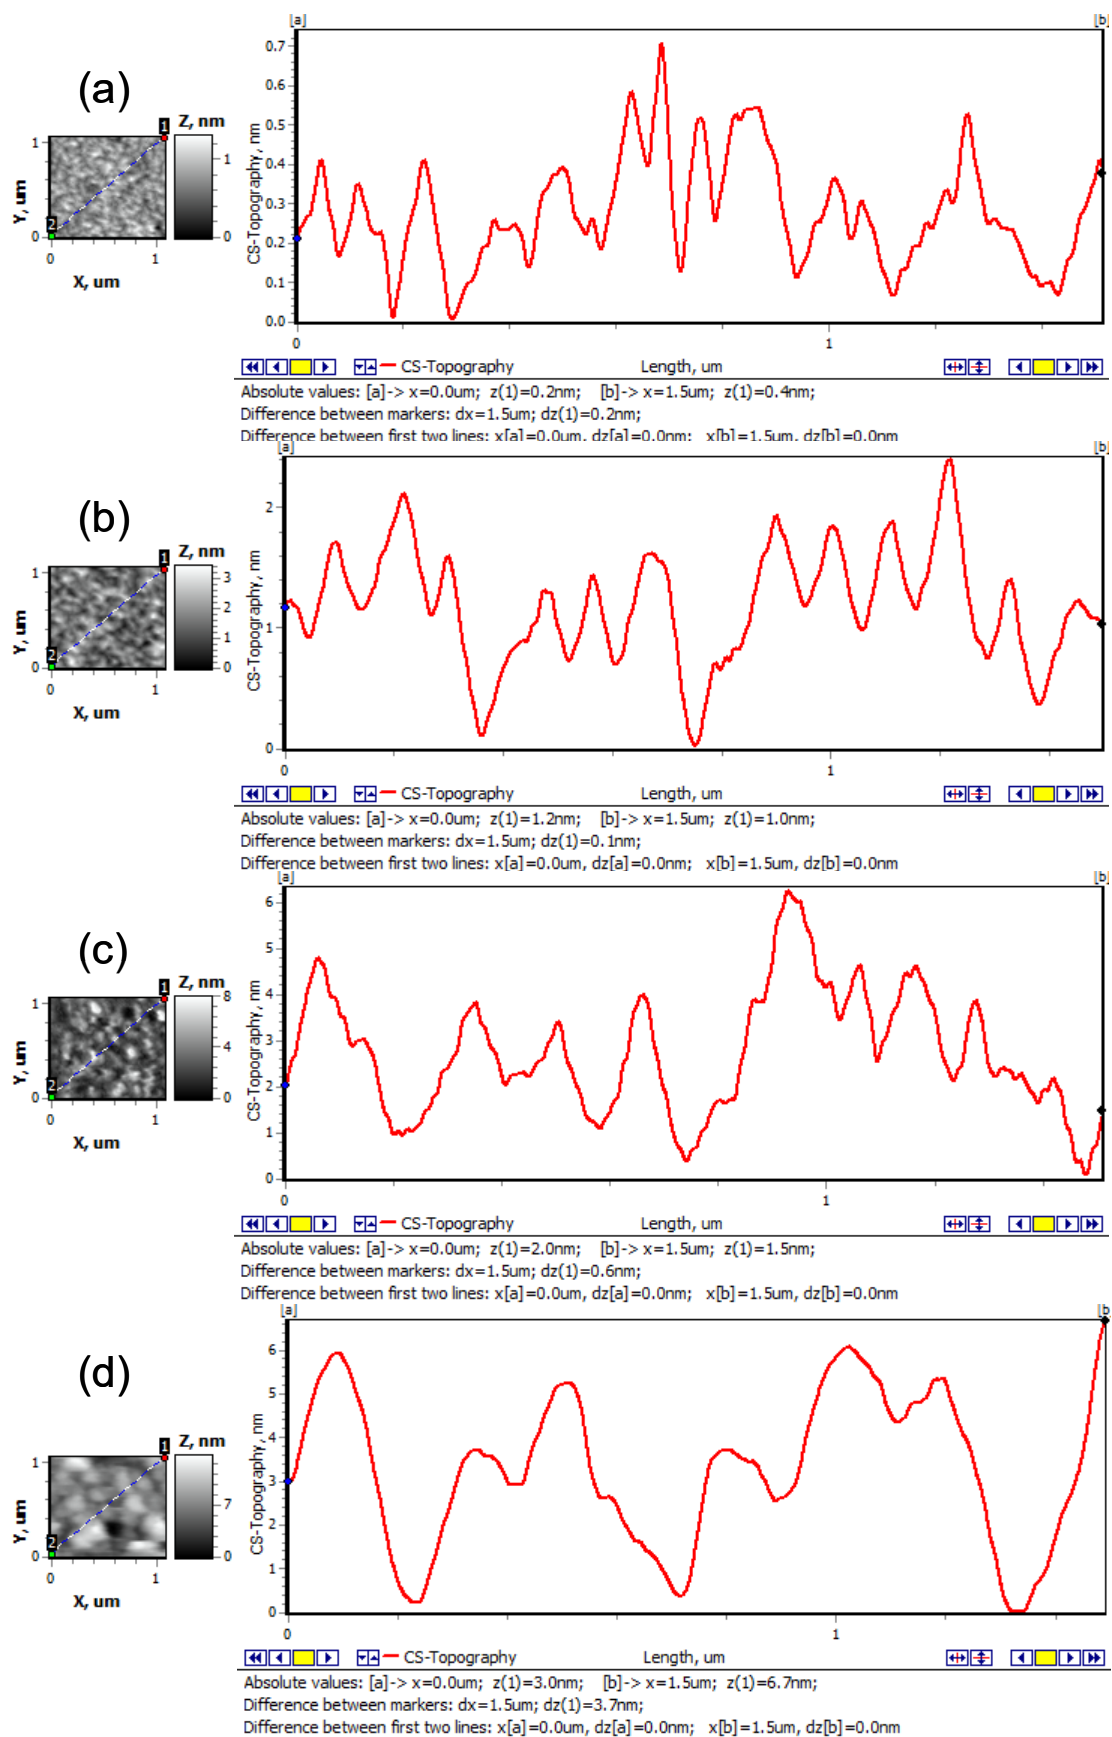

**Figure S1.** Characteristic height profiles for the corresponding lines drawn in AFM images of pristine graphene (a), N35 (b), N75 (c) and N110 (d)

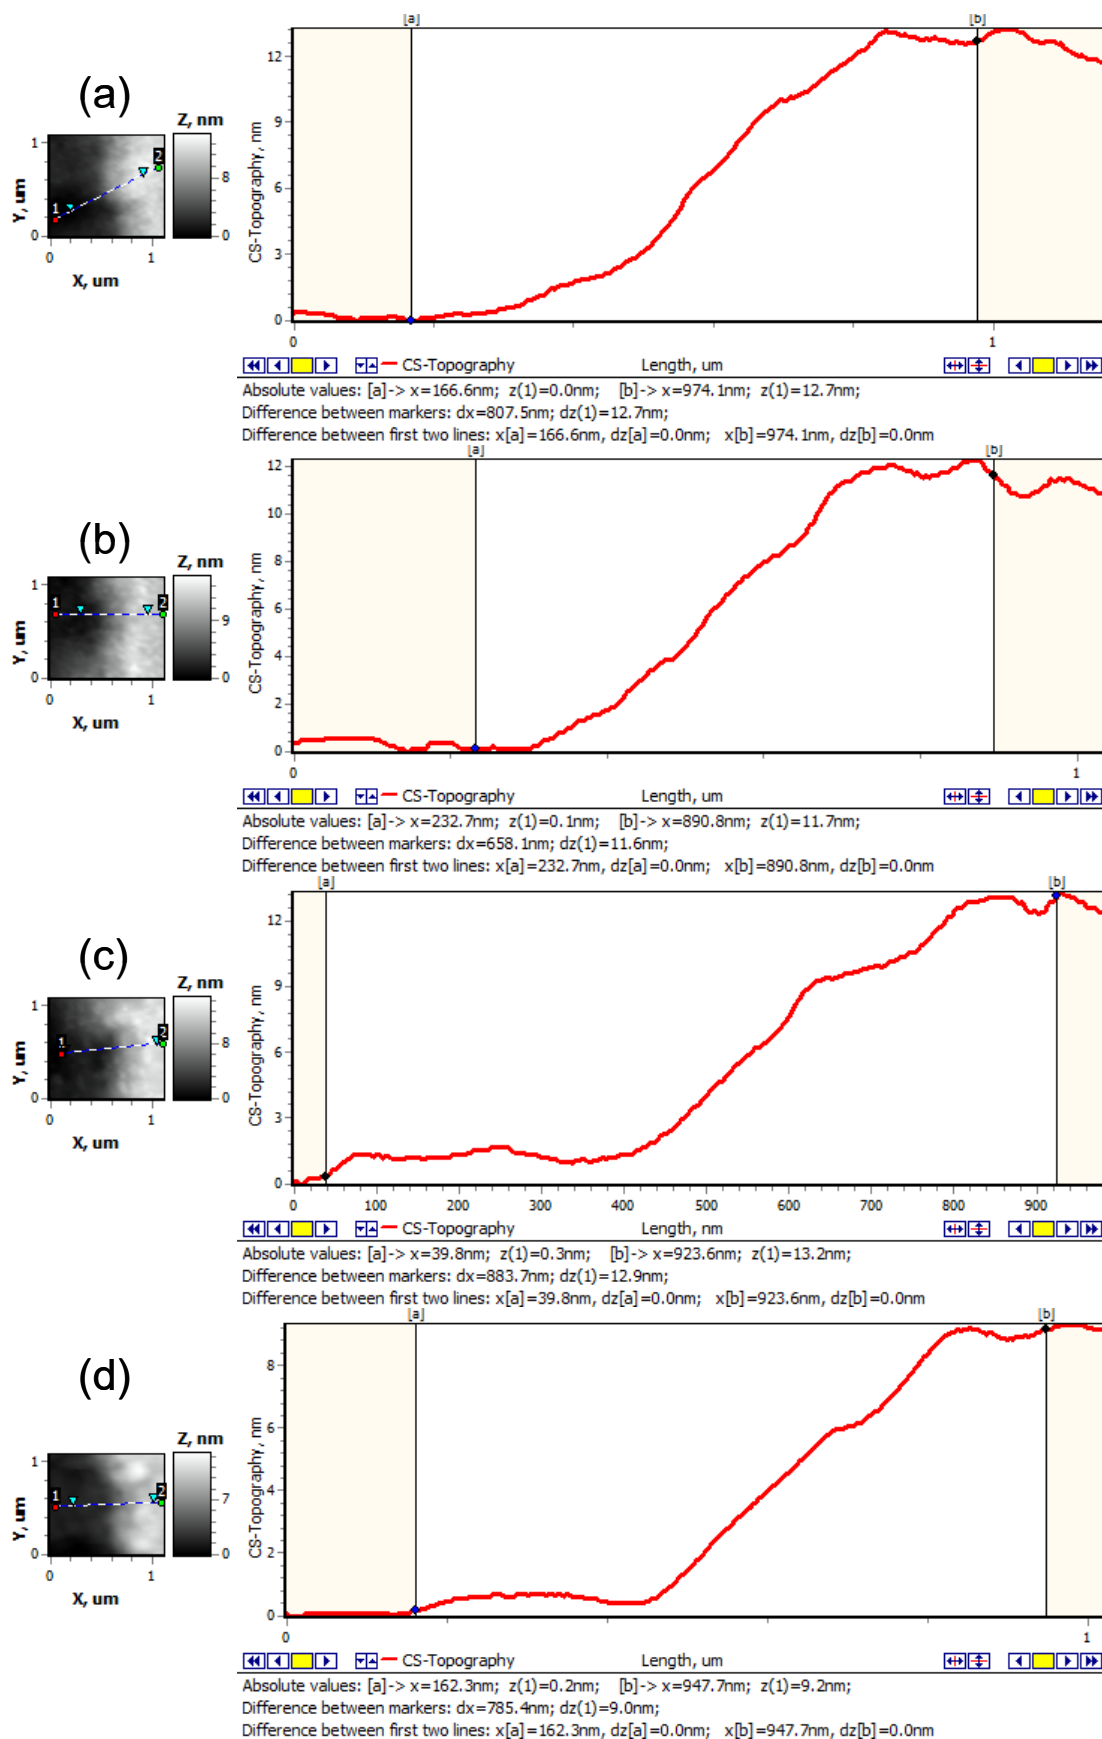

**Figure S2.** Characteristic step profiles for the corresponding lines drawn in AFM images of pristine graphene (a), N35 (b), N75 (c) and N110 (d)

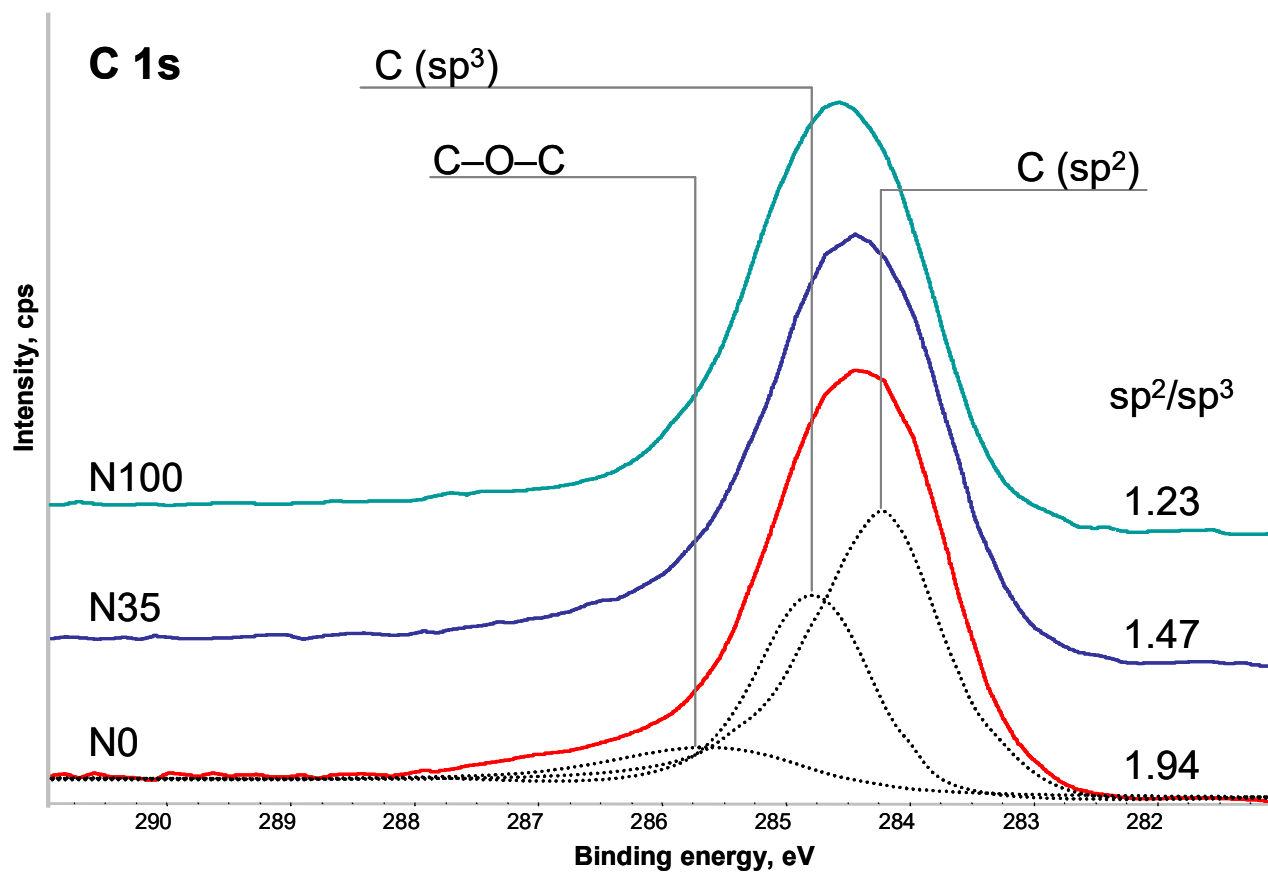

**Figure S3.** Deconvoluted high resolution XPS spectra in C 1s region of N0, N35 and N110
